# Supplementary material for: Association of number of Laryngoscopic Attempts during the transitional period and Severe Intraventricular Hemorrhage in Extreme Preterm Infants
Source: Research Square preprint supplement (doi:10.21203/rs.3.rs-8237856/v1), 2025-12-08
Supplement: Supplementary file 1 [file 117a70fc078447ec8e9373c1.docx]

**Supplementary- Table 5. Subgroup analysis according to gestational age.**

|  | <26weeks gestational age (N= 349) | | | ≥ 26weeks gestational age (N= 412) | | |
| --- | --- | --- | --- | --- | --- | --- |
|  | **Single LA** | **Multiple LA** | **P value** | **Single LA** | **Multiple LA** | **P value** |
| IVH during the first 3 days of life, % (n) |  |  | **0.37** |  |  | **0.71** |
| No IVH | 38 (76/201) | 31 (46/148) |  | 54 (135/250) | 55 (89/162) |  |
| IVH Grade I | 38 (76/201) | 38 (56/148) |  | 34 (86/250) | 33 (54/162) |  |
| IVH Grade II | 11 (22/201) | 11 (17/148) |  | 6 (15/250) | 8 (13/162) |  |
| IVH ≥ Grade III | 13 (27/201) | 20 (29/148) |  | 6 (14/250) | 4 (6/162) |  |

LA: Laryngeal attempts. Notes: the reported p-values were based on the comparison between two groups using Chi-square test.
