# Supplementary material for: Association of number of Laryngoscopic Attempts during the transitional period and Severe Intraventricular Hemorrhage in Extreme Preterm Infants
Source: Research Square preprint supplement (doi:10.21203/rs.3.rs-8237856/v1), 2025-12-08
Supplement: Supplementary file 2 [file 8647252d473439ad33e6fff0.docx]

# **Table 1:** **Demographic data and baseline characteristics of the study groups**

|  | **No LA**  (n= 162) | **Single LA**  (n= 451) | **Multiple LA**  (n= 310) | P value1 | P value2 | P value3 |
| --- | --- | --- | --- | --- | --- | --- |
| Gestational Age, wk, median (IQR) | 27.6 (26.6, 28.4) | 26.3 (24.7, 27.6) | 26.05 (24.6, 27.6) | <0.0001 | <0.0001 | 0.23 |
| Birth Weight, g, median (IQR) | 1010 (820, 1160) | 810 (660, 1000) | 770 (620, 990) | <0.0001 | <0.0001 | 0.08 |
| Male Sex, n (%) | 76 (47) | 254 (56) | 155 (50) | 0.04 | 0.52 | 0.09 |
| Antenatal steroids, n (%) | 132 (81) | 315 (70) | 194 (63) | 0.004 | <0.0001 | 0.04 |
| PROM >18 hours | 43 (69/462) | 31 (139/451) | 37 (114/310) | 0.007 | 0.22 | 0.09 |
| Chorioamnionitis, % (n) | 30 (48/162) | 23 (103/451) | 24 (73/310) | 0.09 | 0.15 | 0.82 |
| Cesarean Delivery, n (%) | 73 (45) | 262 (58) | 165 (53) | 0.004 | 0.09 | 0.18 |
| Delayed cord clamping, % (n) | 72 (117/162) | 50.8 (229/451) | 46.8 (145/310) | <0.0001 | <0.0001 | 0.28 |
| 5 min –Apgar, median (IQR) | 9 (9, 9) | 8 (5, 9) | 7 (4, 8) | <0.0001 | <0.0001 | 0.007 |
| Chest compression, % (n) | 0 (0/162) | 3 (15/451) | 4 (12/310) | 0.02* | 0.01* | 0.69 |
| Inotropes during first 72 hr, % (n) | 1 (1/162) | 11 (48/451) | 13 (40/310) | <0.0001 | <0.0001 | 0.34 |
| Surfactant, n (%) | 6 (4)* | 96 (434/451) | 95 (294/310) | <0.0001 | <0.0001 | 0.35 |
| Premedication use, n (%) | 0 (0) | 96 (21) | 70 (23) | <0.0001 | <0.0001 | 0.67 |
| IMV in the first 72 hr, n (%) | 0 (0) | 77 (347/451) | 80 (248/310) | <0.0001 | <0.0001 | 0.32 |
| SNAP score ≥ 20 | 2.47 (4/162) | 28.29 (127/449) | 31.27 (96/307) | <0.0001 | <0.0001 | 0.38 |
| Early Onset Sepsis, n (%) | 2 (1) | 14 (3) | 25 (8) | 0.58* | 0.007 | 0.002 |

LA: Laryngoscope Attempts; IMV: Invasive Mechanical Ventilation.

P value1, P value2, and P value3 are the comparisons between no LA and single LA, no LA and multiple LA, and single LA and multiple LA, respectively.

*6 cases received surfactant “Surfactant inhalation trial”.
