# Supplementary material for: Association of number of Laryngoscopic Attempts during the transitional period and Severe Intraventricular Hemorrhage in Extreme Preterm Infants
Source: Research Square preprint supplement (doi:10.21203/rs.3.rs-8237856/v1), 2025-12-08
Supplement: Supplementary file 3 [file c3ae64dc8cce40cc19425a24.docx]

**Table 2. Primary outcome (IVH during first 72hrs after birth)**

|  | No LA  (n= 162) | Single LA  (n= 451) | Multiple LA  (n= 310) | P value1 | P value2 | P value3 |
| --- | --- | --- | --- | --- | --- | --- |
| **Intubation attempts** | | | | | | |
| No IVH, n (%) | 104 (64) | 211 (47) | 135 (44) | 0.0009 | <0.0001 | 0.62 |
| IVH Grade I, n (%) | 45 (28) | 162 (36) | 110 (35) |
| IVH Grade II, n (%) | 7 (4) | 37 (8) | 30 (10) |
| IVH ≥ Grade III n (%) | 6 (4) | 41(9) | 35 (11) |

P value1, P value2, and P value3 are the comparisons between none and single, none and multiple, and single and multiple, respectively.

LA: Laryngoscope Attempts; IVH: Intraventricular Hemorrhage.
