# Supplementary material for: Association of number of Laryngoscopic Attempts during the transitional period and Severe Intraventricular Hemorrhage in Extreme Preterm Infants
Source: Research Square preprint supplement (doi:10.21203/rs.3.rs-8237856/v1), 2025-12-08
Supplement: Supplementary file 4 [file c87360660f5247b5dd8a3a19.docx]

**Table 3 (a, b). Multivariable regression analysis for severe IVH (≥ Grade III)**

**Table 3a***

|  | **Unadjusted odds ratio (95% CI)** | **Adjusted odds ratio (95% CI)** |
| --- | --- | --- |
| **Single LA** | 2.60 (1.08, 6.25) | 1.58 (0.63, 3.95) |
| **Multiple LA** | 3.31 (1.36, 8.04) | 1.87 (0.73, 4.76) |

* “No LA” is used as the reference.

**Table 3b** **

|  | **Unadjusted odds ratio (95% CI)** | **Adjusted odds ratio (95% CI)** |
| --- | --- | --- |
| **Single LA** | Ref | Ref |
| **Multiple LA** | 1.27 (0.79, 2.05) | 1.18 (0.72, 1.93) |

** “Single LA” is used as the reference.

Notes: Adjusted odds ratio, based on the multiple logistic regression model adjusted for gestational age, antenatal steroids, male sex, DCC and chorioamnionitis.
