# Supplementary material for: Association of number of Laryngoscopic Attempts during the transitional period and Severe Intraventricular Hemorrhage in Extreme Preterm Infants
Source: Research Square preprint supplement (doi:10.21203/rs.3.rs-8237856/v1), 2025-12-08
Supplement: Supplementary file 5 [file e759bd6ea330a07a5ee953e3.docx]

**Table 4:** **Outcome (IVH) for LISA group vs Endotracheal Intubation group.**

|  | **No LA**  (n= 162) | **LA for LISA**  (n= 221) | **LA for ETT**  (n= 540) | P value1 | P value2 | P value3 |
| --- | --- | --- | --- | --- | --- | --- |
| No IVH, n (%) | 104 (64) | 99 (45) | 247 (46) | 0.002 | <0.0001 | 0.0007 |
| IVH Grade I, n (%) | 45 (28) | 98 (44) | 174 (32) |
| IVH Grade II, n (%) | 7 (4) | 11 (5) | 56 (10) |
| IVH ≥ Grade III n (%) | 6 (4) | 13 (6) | 63 (12) |

ETT: Endotracheal Intubation
